# Supplementary material
Source: PubMed Central journal article supplement (PMC6926447)
Supplement: supp_RA119.011337_156250_1_supp_424553_q09knp.pdf [file supp_RA119.011337_156250_1_supp_424553_q09knp.pdf]

**Fig. S1**

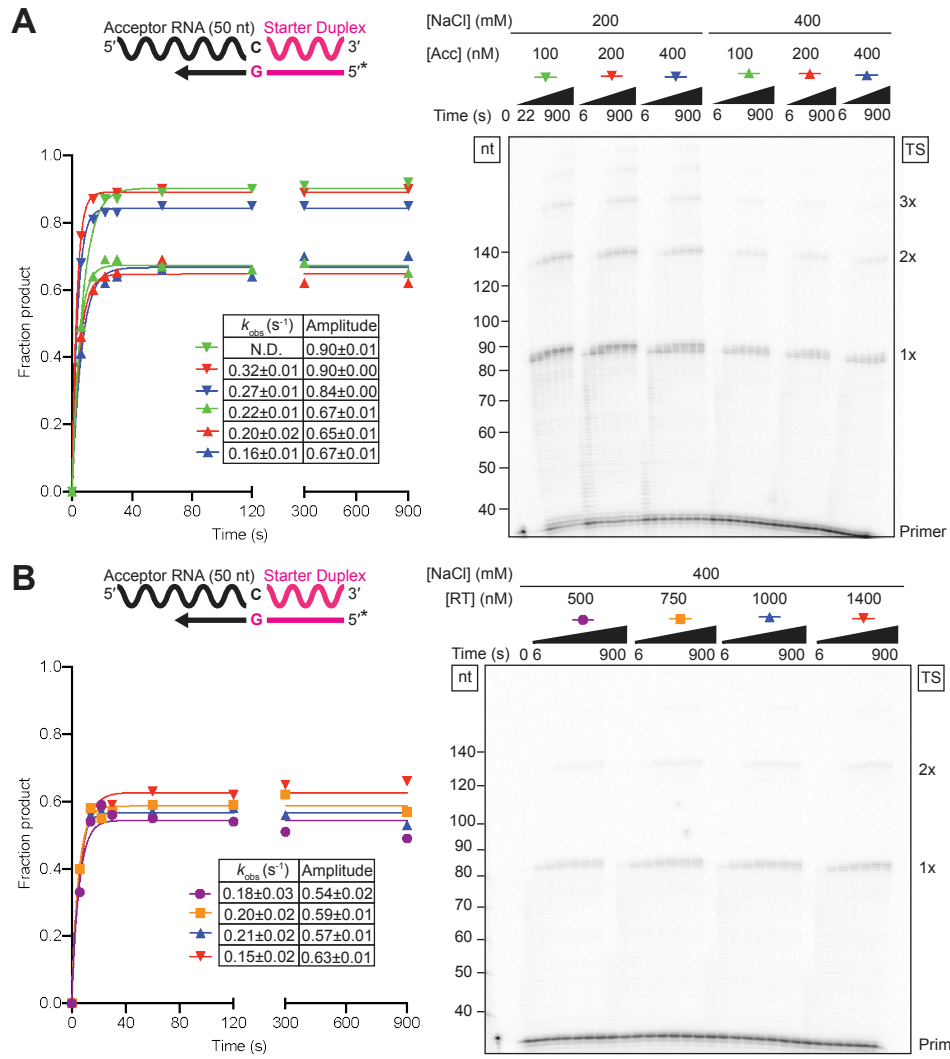

Fig. S2

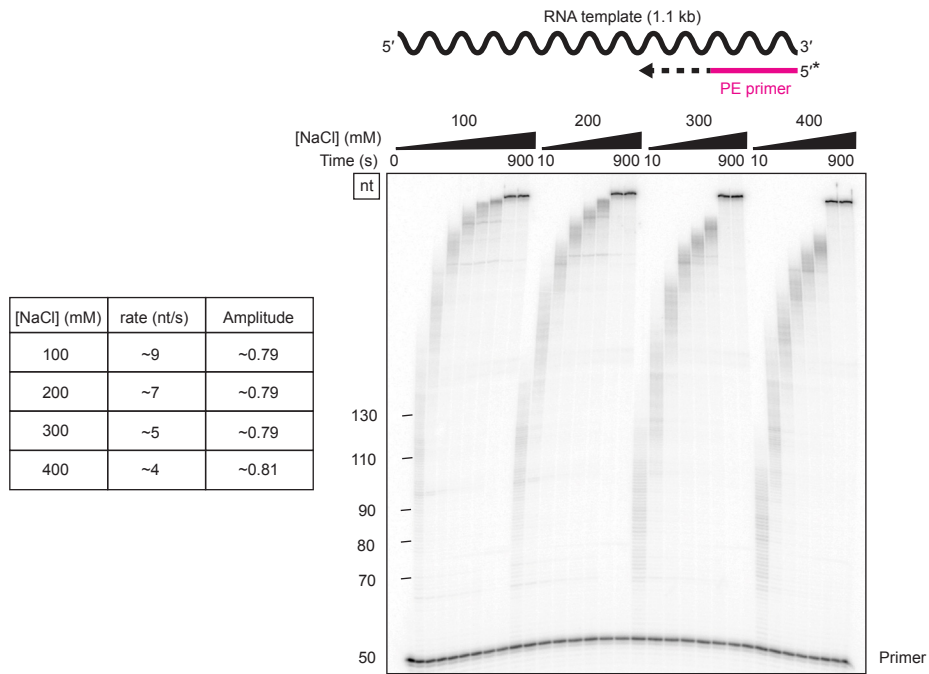

**Fig. S3**

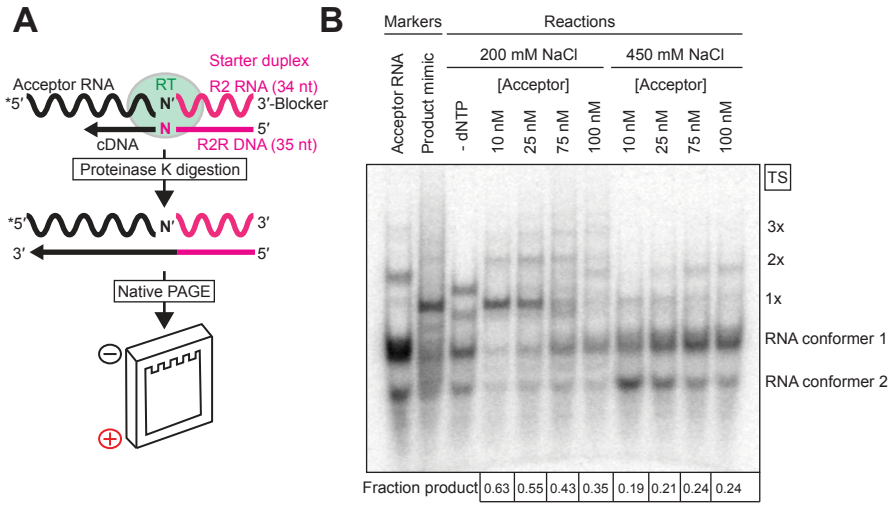

**Fig. S4**

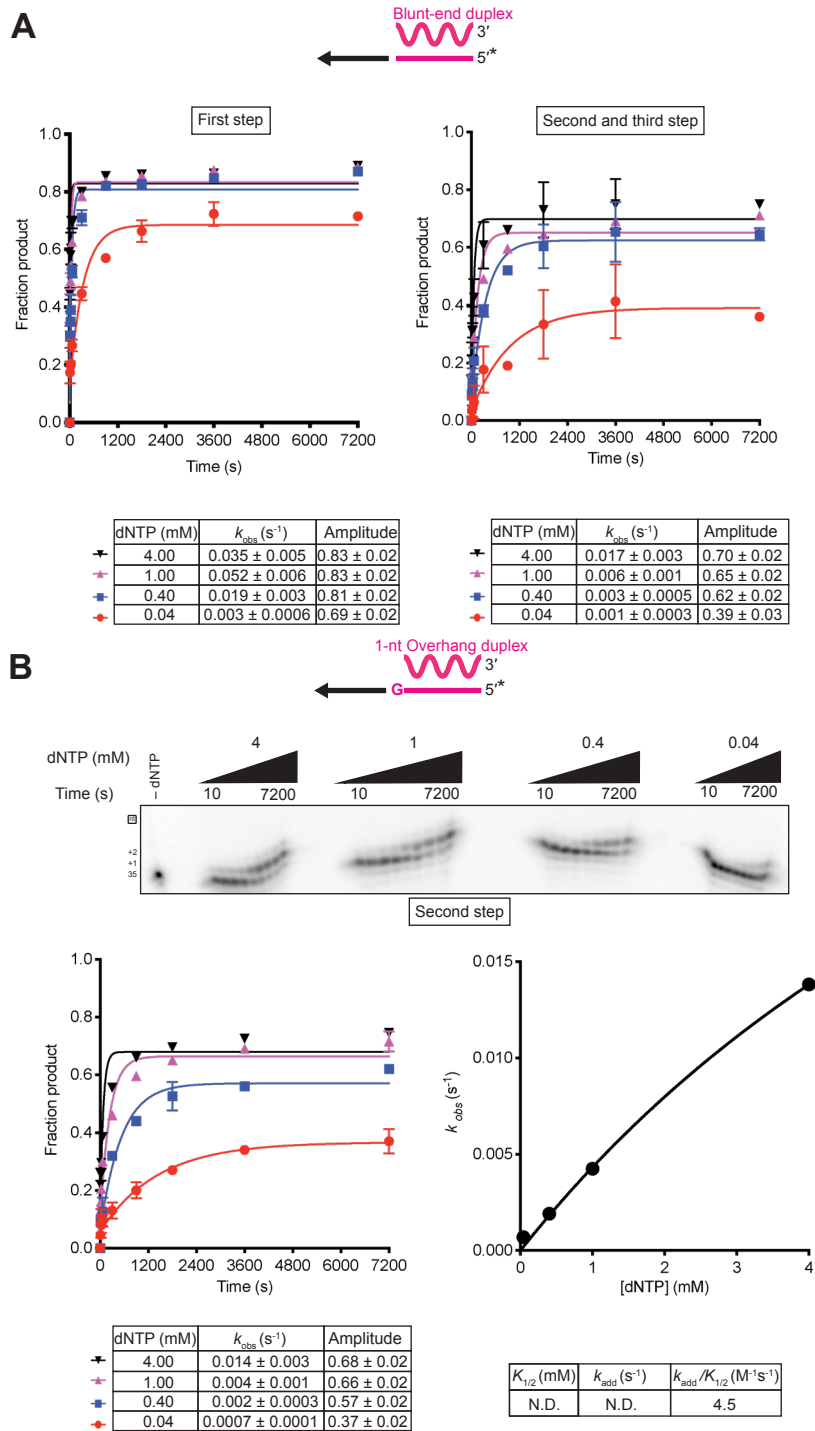

**Fig. S5**

Blunt-end duplex  
3'  
5\*

1-nt Overhang duplex  
3'  
5\*

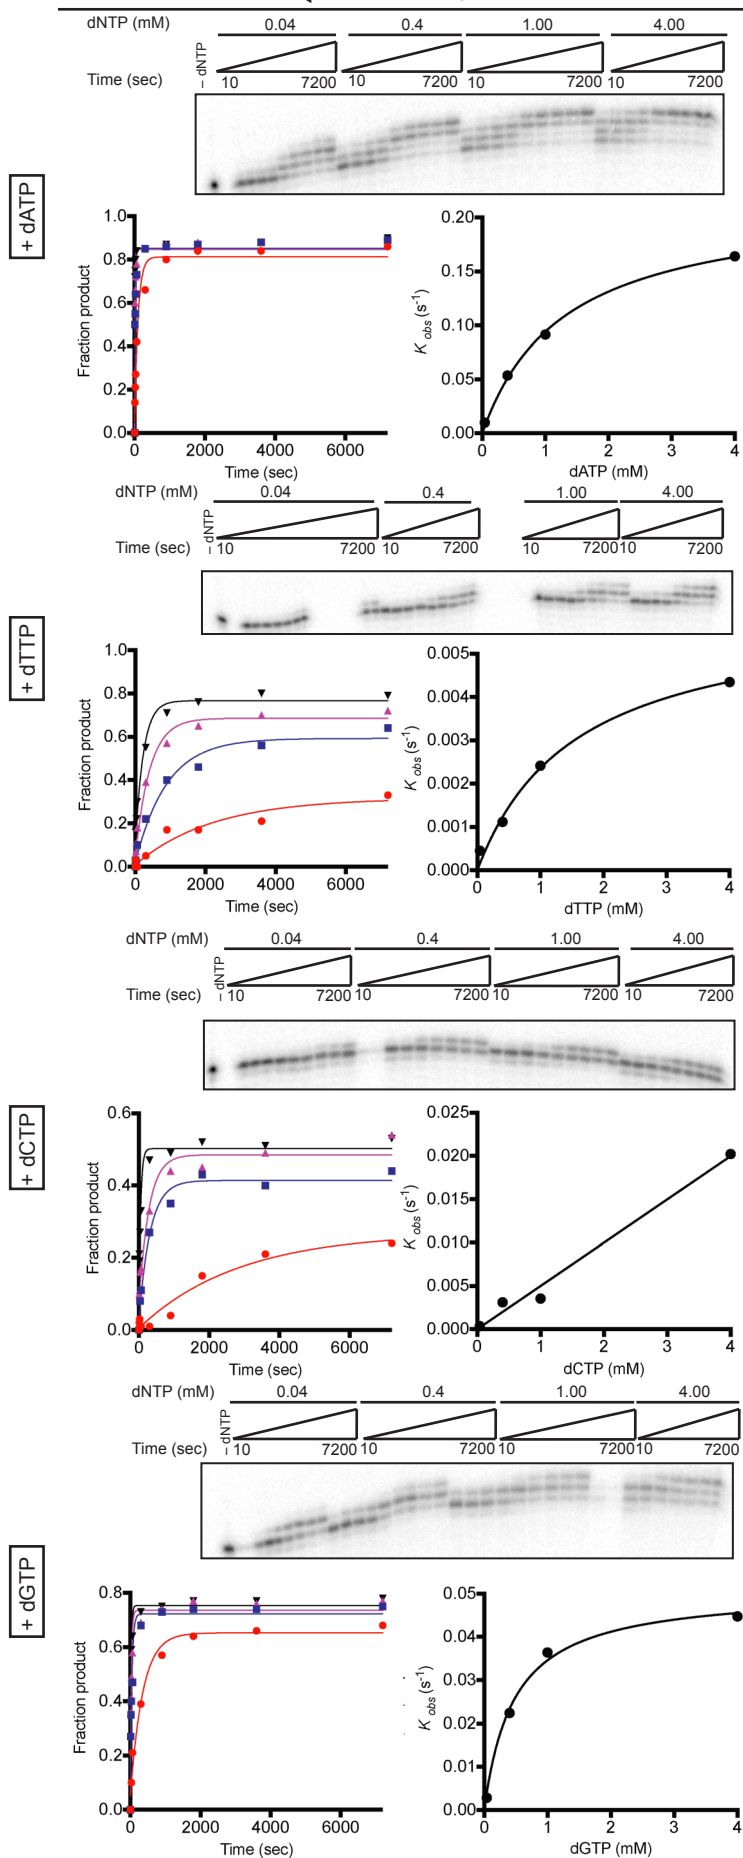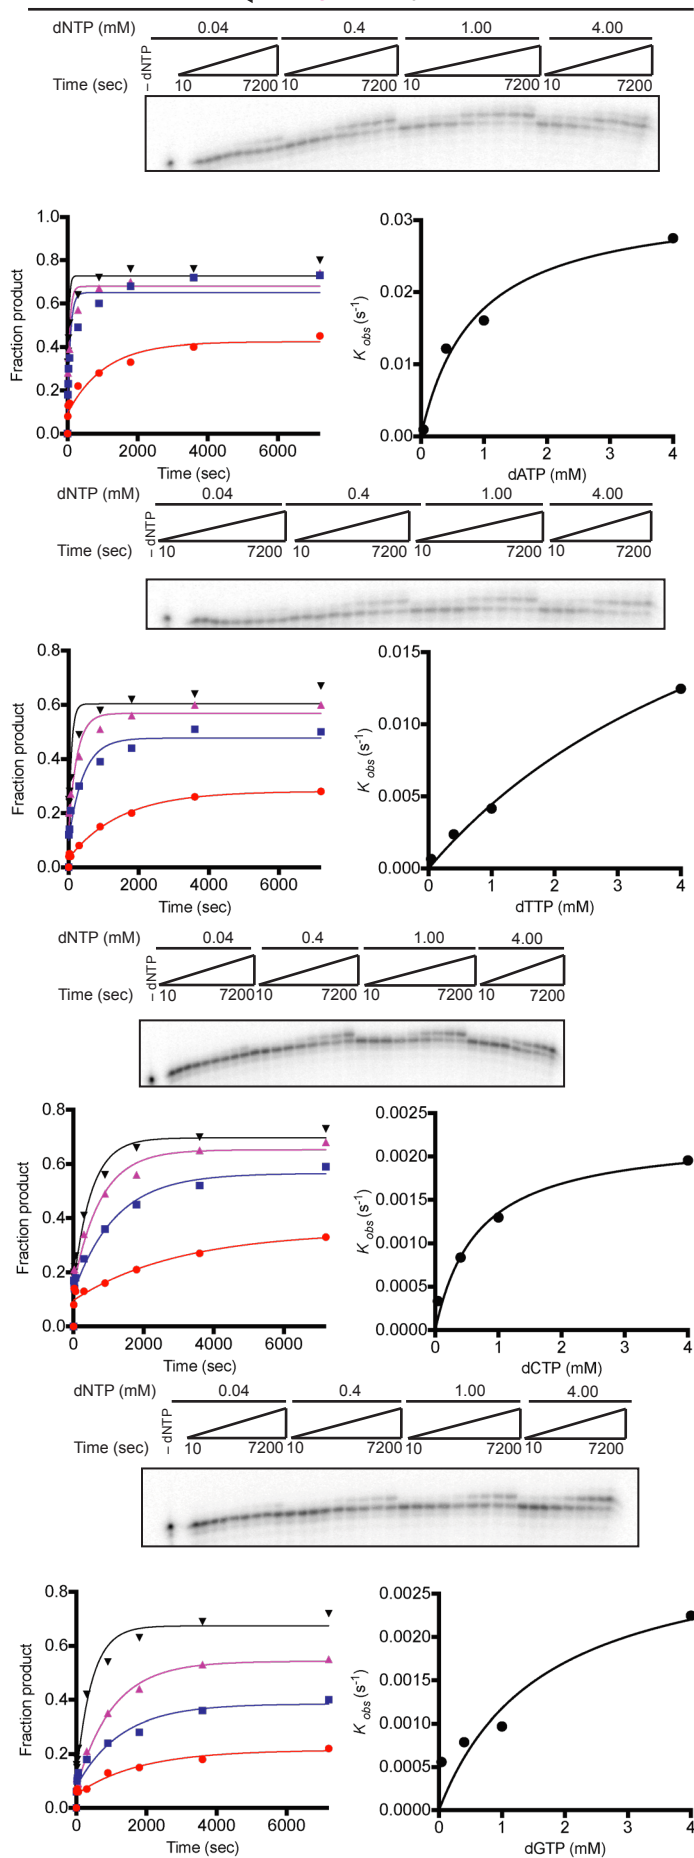

**Fig. S6**

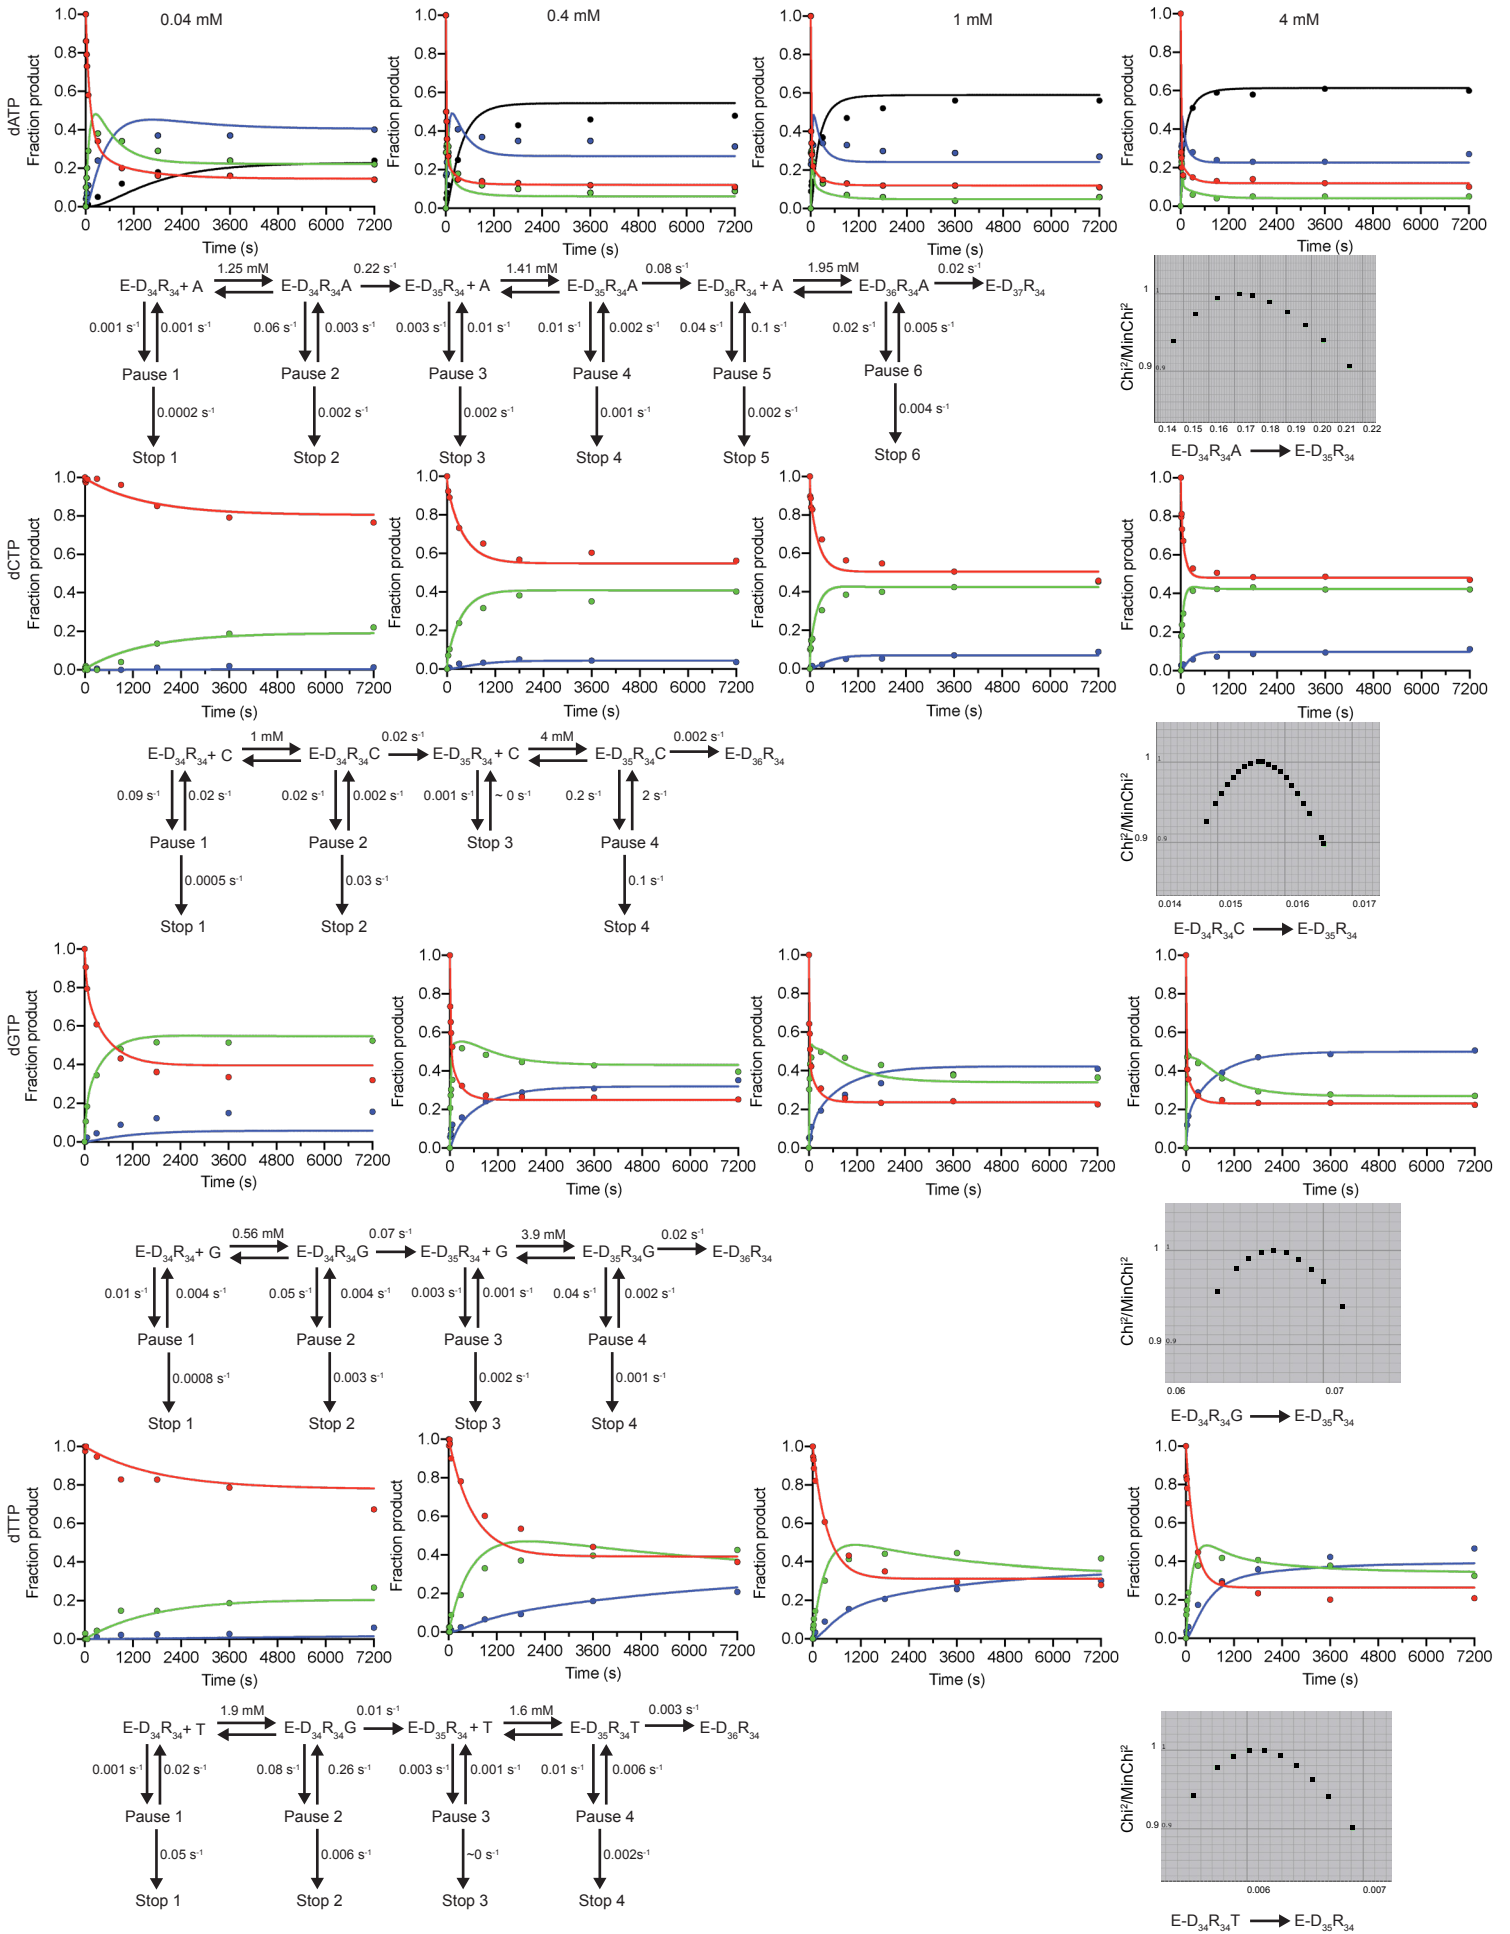

**Fig. S7**

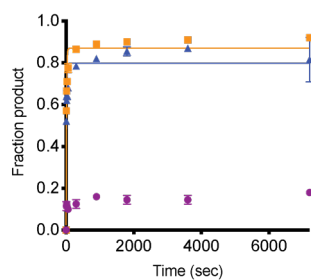

|         | $k_{\text{obs}}$ ( $\text{s}^{-1}$ ) | Amplitude |
|---------|--------------------------------------|-----------|
| ssDNA   | N.D.                                 | N.D.      |
| RNA/DNA | 0.07                                 | 0.87      |
| DNA/DNA | 0.07                                 | 0.80      |

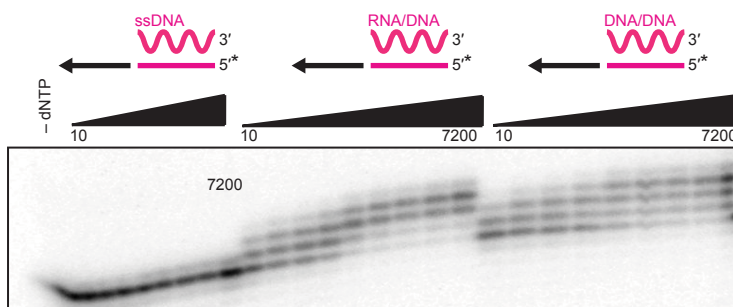

**Fig. S8**

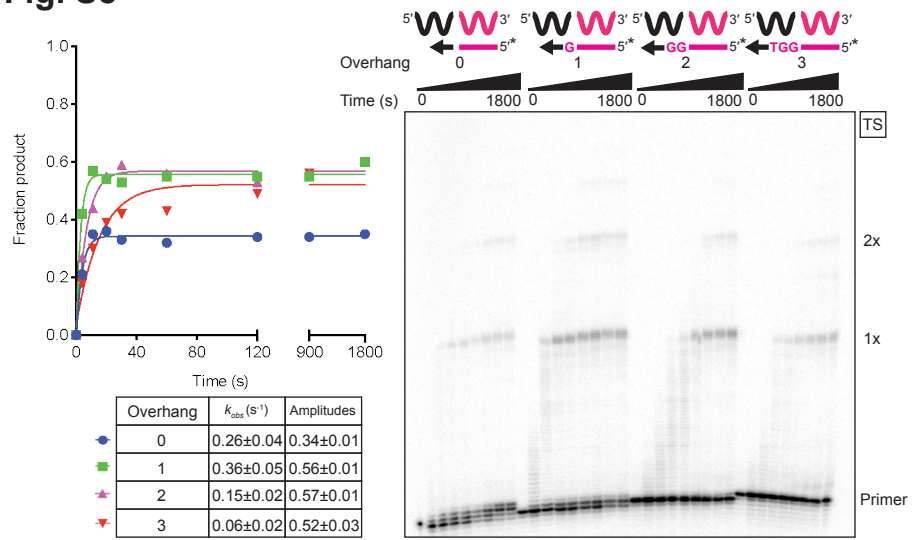



**Fig. S9**

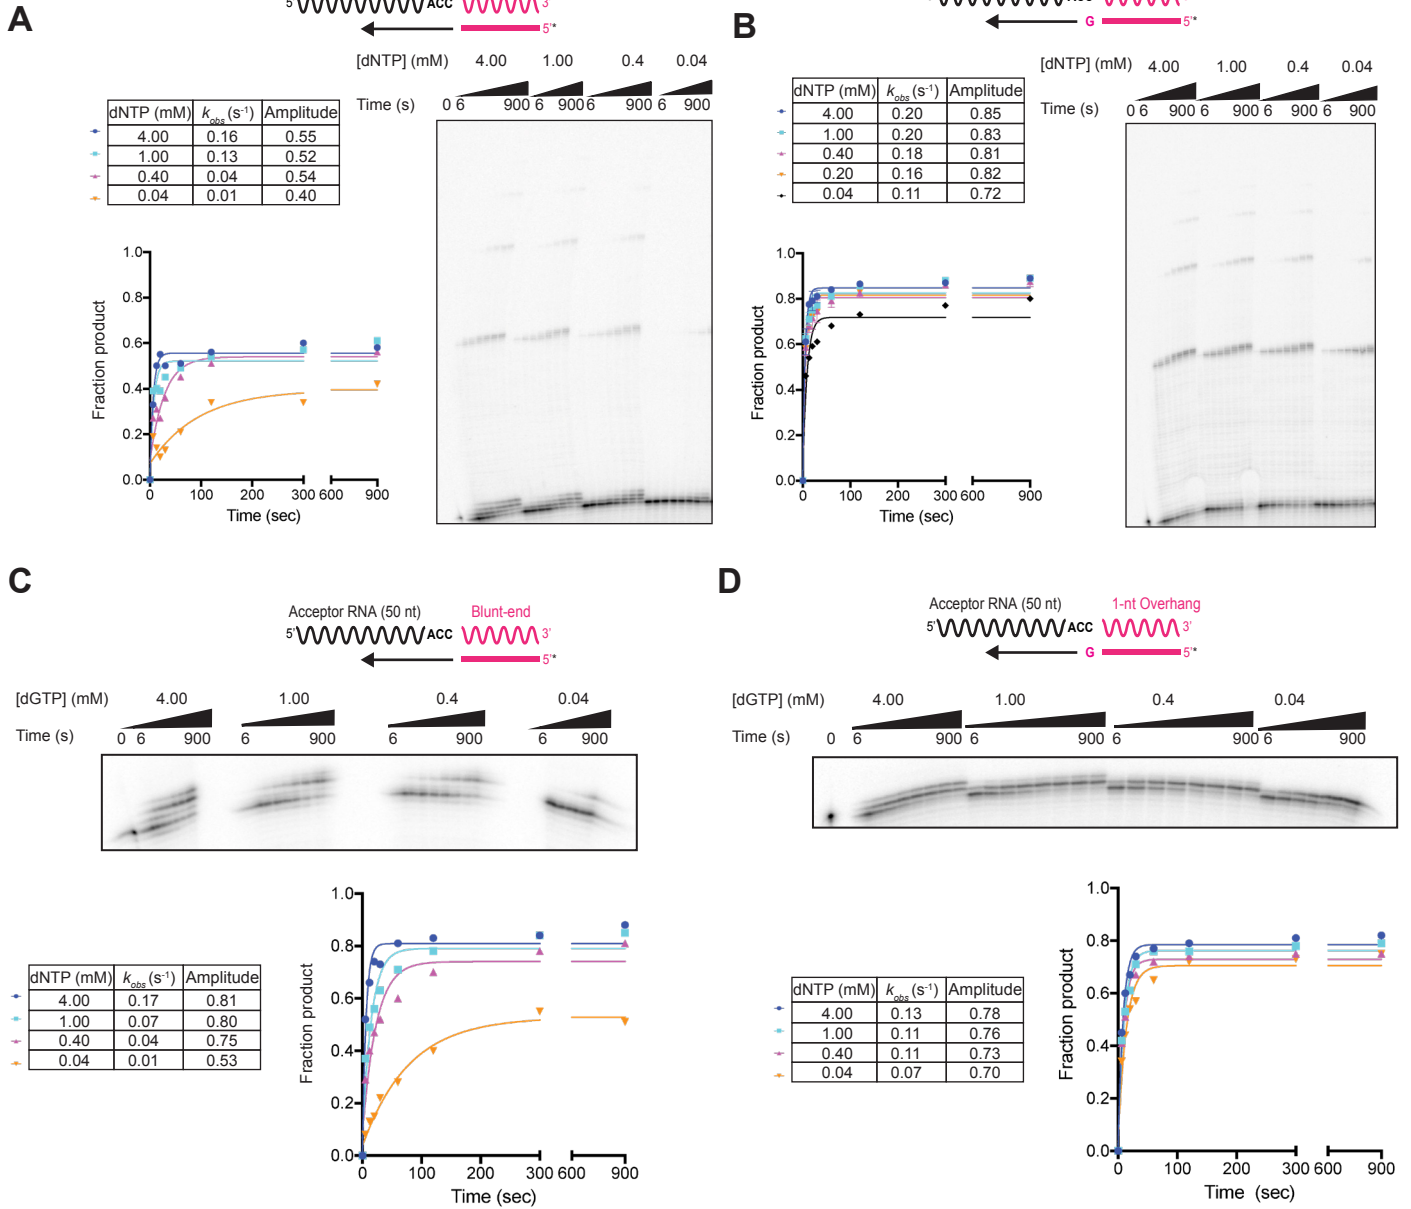

**Fig. S10**

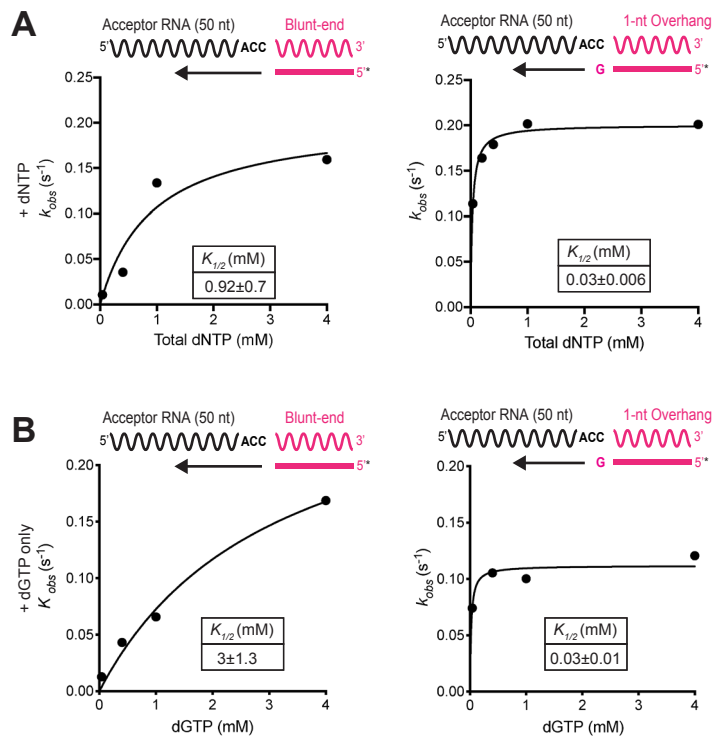

# Table S1

| Type                           | Oligonucleotide name          | Oligonucleotide Sequence                                                                   |
|--------------------------------|-------------------------------|--------------------------------------------------------------------------------------------|
| Acceptors nucleic acids        | 50 nt Acceptor A (RNA)        | CGCCGGACCGUGCACCAUCUGGAGUUUAUAGAGAUGAGUCUCACAUAGACA                                        |
|                                | 50 nt Acceptor U (RNA)        | CGCCGGACCGUGCACCAUCUGGAGUUUAUAGAGAUGAGUCUCACAUAGACU                                        |
|                                | 50 nt Acceptor G (RNA)        | CGCCGGACCGUGCACCAUCUGGAGUUUAUAGAGAUGAGUCUCACAUAGACG                                        |
|                                | 50 nt Acceptor C (RNA)        | CGCCGGACCGUGCACCAUCUGGAGUUUAUAGAGAUGAGUCUCACAUAGACC                                        |
|                                | 50 nt Acceptor C (DNA)        | CGCCGGACCGTGCACCATCTGGAGTTATAGAGATGAGTCTCACATAGACC                                         |
|                                | 21 nt Acceptor OH (RNA)       | GCCGCUUCAGAGAGAAAUCGC                                                                      |
|                                | 21 nt Acceptor P (RNA)        | GCCGCUUCAGAGAGAAAUCGC3' P                                                                  |
|                                | 21 nt Acceptor 2Meo (RNA)     | GCCGCUUCAGAGAGAAAUCG2' OMe                                                                 |
|                                | 21 nt Acceptor OH (DNA)       | GCCGCTTCAGAGAGAAATCGC                                                                      |
|                                | 21 nt Acceptor OH (DNA)       | GCCGCTTCAGAGAGAAATCG3' ddC                                                                 |
| Components of starter duplexes | R2R A (DNA)                   | GTGACTGGAGTTCAGACGTGTGCTCTTCCGATCTA                                                        |
|                                | R2R T (DNA)                   | GTGACTGGAGTTCAGACGTGTGCTCTTCCGATCTT                                                        |
|                                | R2R G (DNA)                   | GTGACTGGAGTTCAGACGTGTGCTCTTCCGATCTG                                                        |
|                                | R2R C (DNA)                   | GTGACTGGAGTTCAGACGTGTGCTCTTCCGATCTC                                                        |
|                                | R2R GG (DNA)                  | GTGACTGGAGTTCAGACGTGTGCTCTTCCGATCTGG                                                       |
|                                | R2R GGT (DNA)                 | GTGACTGGAGTTCAGACGTGTGCTCTTCCGATCTGGT                                                      |
|                                | R2R Blunt (DNA)               | GTGACTGGAGTTCAGACGTGTGCTCTTCCGATCT                                                         |
|                                | Native PAGE Product Marker    | GTGACTGGAGTTCAGACGTGTGCTCTTCCGATCT -<br>GGTCTATGTGAGACTCATCTCTATAACTCCAGATGGTGCACGGTCCGGCG |
|                                | Primer extension assay primer | TCTTCGGGGCGAAAACCTCTCAAGGATCTTACCGCTGTTGAGATCCAGTTC                                        |
| Sequencing primers             | R2 (RNA)                      | AGAUCGGAAGAGCACACGUCUGAACUCCAGUCAC                                                         |
|                                | R1R (DNA)                     | GATCGTCGGACTGTAGAACTCTGAACGTGTAG                                                           |
|                                | Multiplex primer              | AATGATACGGCGACCACCGAGATCTACACGTTACAGTTCTACAGTCCGACGATC                                     |
|                                | Illumina barcode PCR primer   | CAAGCAGAAGACGGCATACGAGAT <b>BARCODE</b> GTGACTGGAGTTCAGACGTGTGCTCTTCCGATCT                 |

# Table S2

| Duplex   | dNTP | dNTP (mM) | $k_{obs}$ (s <sup>-1</sup> ) | Product amplitude | $K_{1/2}$ (mM) | $k_{add}$ (s <sup>-1</sup> ) | $k_{add}/K_{1/2}$ (M <sup>-1</sup> s <sup>-1</sup> ) |
|----------|------|-----------|------------------------------|-------------------|----------------|------------------------------|------------------------------------------------------|
| Blunt    | dATP | 4.00      | 0.16 ± 0.03                  | 0.85 ± 0.02       | 1.3 ± 0.14     | 0.22 ± 0.01                  | 170                                                  |
|          |      | 1.00      | 0.09 ± 0.02                  | 0.85 ± 0.02       |                |                              |                                                      |
|          |      | 0.40      | 0.05 ± 0.01                  | 0.85 ± 0.03       |                |                              |                                                      |
|          |      | 0.04      | 0.01 ± 0.002                 | 0.81 ± 0.03       |                |                              |                                                      |
|          | dTTP | 4.00      | 0.004 ± 0.001                | 0.76 ± 0.03       | 1.6 ± 0.4      | 0.006 ± 0.0006               | 4                                                    |
|          |      | 1.00      | 0.002 ± 0.0004               | 0.69 ± 0.02       |                |                              |                                                      |
|          |      | 0.40      | 0.001 ± 0.0002               | 0.59 ± 0.03       |                |                              |                                                      |
|          |      | 0.04      | 0.0004 ± 0.0002              | 0.32 ± 0.04       |                |                              |                                                      |
|          | dCTP | 4.00      | 0.02 ± 0.005                 | 0.50 ± 0.02       | N.D.           | N.D.                         | 9                                                    |
|          |      | 1.00      | 0.004 ± 0.001                | 0.49 ± 0.02       |                |                              |                                                      |
|          |      | 0.40      | 0.003 ± 0.0007               | 0.41 ± 0.02       |                |                              |                                                      |
|          |      | 0.04      | 0.0004 ± 0.0001              | 0.27 ± 0.04       |                |                              |                                                      |
|          | dGTP | 4.00      | 0.04 ± 0.006                 | 0.75 ± 0.02       | 0.5 ± 0.08     | 0.05 ± 0.003                 | 100                                                  |
|          |      | 1.00      | 0.04 ± 0.007                 | 0.74 ± 0.03       |                |                              |                                                      |
|          |      | 0.40      | 0.02 ± 0.004                 | 0.72 ± 0.03       |                |                              |                                                      |
|          |      | 0.04      | 0.003 ± 0.0006               | 0.65 ± 0.02       |                |                              |                                                      |
| Overhang | dATP | 4.00      | 0.03 ± 0.007                 | 0.73 ± 0.03       | 0.9 ± 0.25     | 0.03 ± 0.003                 | 33                                                   |
|          |      | 1.00      | 0.02 ± 0.005                 | 0.68 ± 0.04       |                |                              |                                                      |
|          |      | 0.40      | 0.01 ± 0.005                 | 0.65 ± 0.04       |                |                              |                                                      |
|          |      | 0.04      | 0.001 ± 0.0004               | 0.42 ± 0.04       |                |                              |                                                      |
|          | dTTP | 4.00      | 0.012 ± 0.005                | 0.60 ± 0.03       | 6.0 ± 2.4      | 0.03 ± 0.008                 | 5                                                    |
|          |      | 1.00      | 0.004 ± 0.002                | 0.57 ± 0.03       |                |                              |                                                      |
|          |      | 0.40      | 0.002 ± 0.0009               | 0.48 ± 0.03       |                |                              |                                                      |
|          |      | 0.04      | 0.0007 ± 0.0001              | 0.28 ± 0.01       |                |                              |                                                      |
|          | dCTP | 4.00      | 0.002 ± 0.0007               | 0.70 ± 0.04       | 0.7 ± 0.23     | 0.002 ± 0.0003               | 3                                                    |
|          |      | 1.00      | 0.001 ± 0.0005               | 0.65 ± 0.05       |                |                              |                                                      |
|          |      | 0.40      | 0.0008 ± 0.0003              | 0.57 ± 0.05       |                |                              |                                                      |
|          |      | 0.04      | 0.0003 ± 0.0002              | 0.35 ± 0.08       |                |                              |                                                      |
|          | dGTP | 4.00      | 0.002 ± 0.0006               | 0.67 ± 0.04       | 1.6 ± 1.5      | 0.003 ± 0.001                | 2                                                    |
|          |      | 1.00      | 0.001 ± 0.0002               | 0.54 ± 0.03       |                |                              |                                                      |
|          |      | 0.40      | 0.0007 ± 0.0003              | 0.38 ± 0.04       |                |                              |                                                      |
|          |      | 0.04      | 0.0006 ± 0.0002              | 0.21 ± 0.03       |                |                              |                                                      |

**FIGURE S1. Higher concentrations of GsI-IIC RT or acceptor RNA do not increase amplitudes in template-switching reactions at high salt concentration.** *A*, Template-switching reactions with 500 nM GsI-IIC RT, 50 nM <sup>32</sup>P-labeled (\*) starter duplex and varying concentrations of 50-nt acceptor RNA in reaction media containing 200 or 400 mM NaCl. *B*, Template-switching reactions with 100 nM of 50-nt acceptor RNA, 50 nM <sup>32</sup>P-labeled starter duplex, and varying concentrations of GsI-IIC RT in reaction medium containing 400 mM NaCl. Template-switching reactions were done and analyzed as in Fig. 1.

**FIGURE S2. High salt concentrations have relatively little effect on primer extension by GsI-IIC RT.** Primer extension reactions were done with 50 nM template-primer substrate (a 1.1-kb *in vitro* transcribed RNA with a 50-nt <sup>32</sup>P-labeled (\*) DNA primer (PE primer; Table S1) annealed at its 3' end) and 500 nM GsI-IIC RT in reaction media containing varying NaCl concentrations. The reaction was stopped after times ranging from 10 to 900 s, and the products were analyzed by denaturing PAGE and quantified from a phosphorimager scan of the dried gel. cDNA synthesis rates were approximated by the mean progression of nucleotide bands. The fraction product was measured by quantifying products larger than the primer and remained largely unchanged throughout the reaction. Extension rates and the end point fraction product are shown to the left.

**FIGURE S3. Template-switching reactions with varying concentrations of a 5'-labeled acceptor RNA analyzed by nondenaturing PAGE.** Template-switching reactions with varying concentrations of a 5' <sup>32</sup>P-labeled (\*) 50-nt acceptor RNA with a 3'-C residue and 50 nM of starter duplex with a 1-nt 3'-G overhang were done for 15 min at 60 °C in reaction medium containing 200 or 450 mM NaCl. After treatment with proteinase K to remove GsI-IIC RT, the products were analyzed by electrophoresis in a nondenaturing 8% polyacrylamide gel. The acceptor RNA (denatured by heating to 82 °C in 1x TE and placed on ice), and a product mimic (labeled acceptor RNA and R2 RNA annealed to a complementary 84-nt oligonucleotide corresponding to the sequence of a full-length cDNA) were loaded in parallel lanes. The gel was run at 4 °C at a constant power of 3 W to maintain the duplex structure and then dried and scanned with a phosphorimager. The labels to the right of the gel indicate the products resulting from the initial template switch (1x) and subsequent end-to-end template switches from the 5' end of one acceptor to the 3' end of another (2x, 3x, *etc.*). Putative product bands were summed and divided by the product and substrate bands to obtain a measure of the fraction product formed, which is indicated under each lane.

**FIGURE S4. Non-templated nucleotide addition activity to blunt-end and 1-nt 3' overhang starter duplexes using mixed dNTPs.** *A*, Reactions included 500 nM GsI-II RT and 50 nM of a blunt-end starter duplex with 5'-<sup>32</sup>P-labeled (\*) DNA primer in a solution containing 200 mM NaCl and varying dNTP concentrations (0.04, 0.4, 1, and 4 mM, where 4 mM is an equimolar mix of 1 mM dATP, dCTP, dGTP, and dTTP). Aliquots were quenched at times from 10 s to 7,200 s, and the products were analyzed by electrophoresis in a denaturing polyacrylamide gel, which was dried and scanned with a phosphorimager (gels and calculated kinetic parameters shown in Fig. 4). *B*, Reactions included 500 nM GsI-II RT and 50 nM of a 1-nt G overhang starter duplex and 200 mM NaCl. Reaction aliquots were stopped at times from 10 to 7,200 s, and the products were analyzed as in *A*. The observed rates for the first NTA from this template were used to calculate the kinetic parameters shown below the plot.

**FIGURE S5. Non-templated nucleotide addition reactions to blunt-end and 1-nt 3' overhang starter duplexes using individual dNTPs.** *A*, Assays of non-templated nucleotide addition to the <sup>32</sup>P-labeled blunt-end RNA/DNA duplex (left) and 1-nt 3'-overhang RNA/DNA duplex (right) using 0.04, 0.4, 1, and 4 mM dATP, dTTP, dCTP and dGTP individually. Reactions included 500 nM GsI-IIC RT and 50 nM of starter duplex in reaction medium containing 200 mM NaCl and were stopped at times ranging from 10 to 7,200 s. The reaction products were analyzed as in Fig. S4. The values obtained from these experiments were used for global fitting analysis in Fig. S6 and for the summary of second-order rate constants in Fig. 5.

**FIGURE S6. Global fitting of consecutive non-templated nucleotide addition using individual dNTPs.** Data and resulting models are shown for NTA of individual dNTPs. For dATP, three NTA steps were observed, and for the other dNTPs only two steps were observed. The plots show global data fitting of consecutive dNTP addition at the indicated concentrations of each dNTP. Each color represents a unique species in the reaction pathway: red, blunt-end starter duplex; green, product after first NTA; blue, product after second NTA; black, product after third NTA (if detected). For details on the global fitting process, see Experimental Procedures. A 1D fitspace plot is shown for each dNTP for the first reaction of nucleotide addition. These plots show the normalized  $\chi^2$  values for a range of values for the rate constant, with a  $\chi^2$  threshold of 0.9.

**Figure S7. Non-templated addition reactions of various starter molecule conformations.** Assays of NTA to 5'- $^{32}\text{P}$ -labeled (\*) single-stranded (ss) DNA (34 nt R2R DNA; left), a 34-bp RNA/DNA duplex (R2 RNA/R2R DNA; center), and a 34-bp DNA/DNA duplex (R2 DNA/R2R DNA; right). Reactions were done with 500 nM GsI-IIC RT and 50 nM substrate in reaction medium containing 200 mM NaCl and 4 mM dNTPs (an equimolar mix of 1 mM dATP, dCTP, dGTP, and dTTP) with time points ranging from 10 to 7,200 s. The reaction products were analyzed as in Fig. S4.

**FIGURE S8. Template switching to DNA acceptors is favored by a single nucleotide 3' overhang.** Template-switching reactions from starter duplexes with a blunt end (0 overhang) or 1, 2, or 3-nt 3' overhangs were done with 500 nM GsI-IIC RT, 100 nM 50-nt acceptor DNA, and 50 nM starter duplex with a  $^{32}\text{P}$ -labeled (\*) DNA primer in reaction medium containing 200 mM NaCl at 60 °C. Reactions were stopped after times ranging from 5 to 1,800 s, and the products were analyzed by denaturing PAGE and quantified from phosphorimager scans of the dried gel. The plots to the left of the gel show the data fit by a single exponential function to calculate the  $k_{\text{obs}}$  and amplitude for each time course, and the values are summarized in the table below the plots together with the standard error of the fit. The gel is labeled as in Fig. 1.

**FIGURE S9. Template-switching reactions from blunt-end and 1-nt 3'-overhang starter duplexes with varying concentrations of dNTPs.** A and B, Template-switching reactions with 50 nM blunt-end (A) or 1-nt overhang (B) starter duplexes with a  $^{32}\text{P}$ -labeled (\*) DNA primer and 100 nM 50-nt acceptor RNA were done with 500 nM GsI-IIC RNA RT and 0.04, 0.4, 1 or 4 mM dNTPs (where 4 mM dNTPs = 1 mM each of dATP, dCTP, dGTP, and dTTP). The reactions were stopped after times ranging from 6 to 900 s, and the products were analyzed by denaturing PAGE and quantified from a phosphorimager scan of the dried gel. The data were fit by a single exponential function to obtain the observed rates and amplitudes, which are summarized in the associated tables. C and D, The same template-switching reactions as in A and B but adding 0.04, 0.4, 1, or 4 mM dGTP, the nucleotide complementary to the last 2 nucleotides (CC) of the acceptor RNA, so that the template-switching products for the (C) blunt-end duplex is 2 nt longer than the DNA primer, and that for the (D) 1-nt overhang duplex is only 1 nt longer than the DNA primer.

**FIGURE S10. Template switching from a blunt-end duplex has a higher  $K_{1/2}$  value for dNTPs than does template switching from a 1-nt 3' overhang duplex.** A and B, the observed rates for template switching at varying (A) dNTP or (B) dGTP concentrations from Fig. S9 were plotted against dNTP concentration and fit by a hyperbolic function to obtain  $K_{1/2}$ .

**TABLE S1. Sequences of oligonucleotides used in this study.** The oligonucleotides are divided into three sections indicated in the left-hand column: acceptor nucleic acids, components of starter duplexes, and sequencing primers.

**TABLE S2. Kinetic parameters for non-templated nucleotide addition of individual nucleotides.** The kinetic parameters of non-templated nucleotide addition with individual nucleotides, with the data shown in Figure S5 and second order rate constants in Fig. 5A.

**TABLE S3. RNA-Seq analysis of template-switching junctions.**
